# Supplementary material
Source: publisher figshare collection journal article supplement (https://acs.figshare.com/ndownloader/files/13535255)
Supplement: Supplementary file 1 [file 13535255]

*Supporting Information for:*

# Selective Synthesis of Site-Differentiated Fe<sub>4</sub>S<sub>4</sub> and Fe<sub>6</sub>S<sub>6</sub> Clusters

*Alex McSkimming and Daniel L. M. Suess\**

Department of Chemistry, Massachusetts Institute of Technology, Cambridge, MA 02139

## **Contents**

|                                                 |     |
|-------------------------------------------------|-----|
| NMR spectra                                     | S2  |
| FTIR Spectra                                    | S11 |
| Additional Spectroscopy                         | S13 |
| <sup>1</sup> H NMR spectra of Reaction Mixtures | S15 |
| References                                      | S16 |

## NMR Spectra

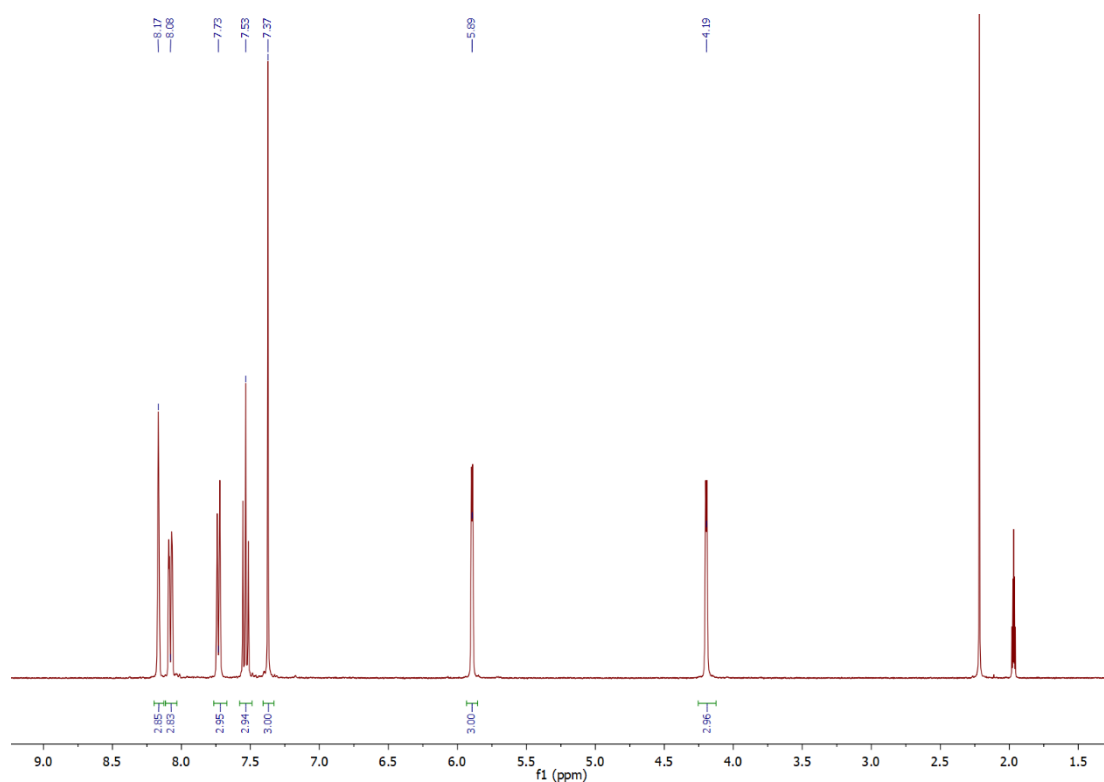

**Figure S1.** <sup>1</sup>H NMR spectrum of **3** recorded in CD<sub>3</sub>CN at 400 MHz.

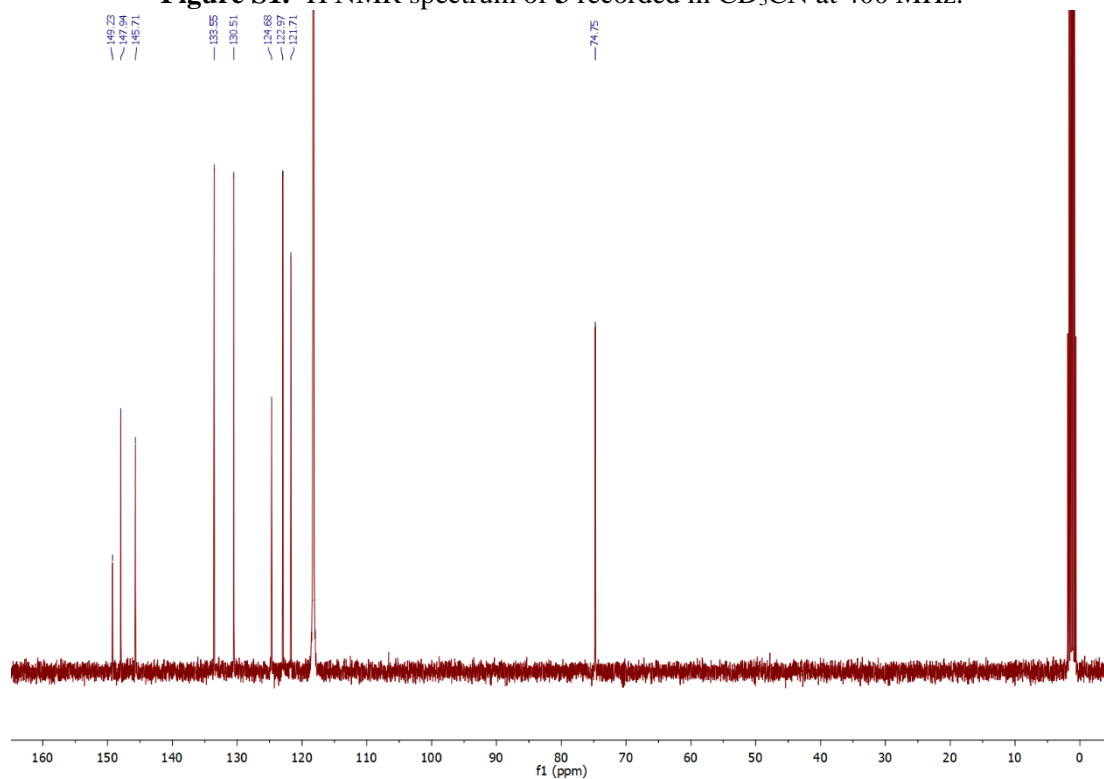

**Figure S2.** <sup>13</sup>C{<sup>1</sup>H} NMR spectrum of **3** recorded in CD<sub>3</sub>CN at 100.5 MHz.

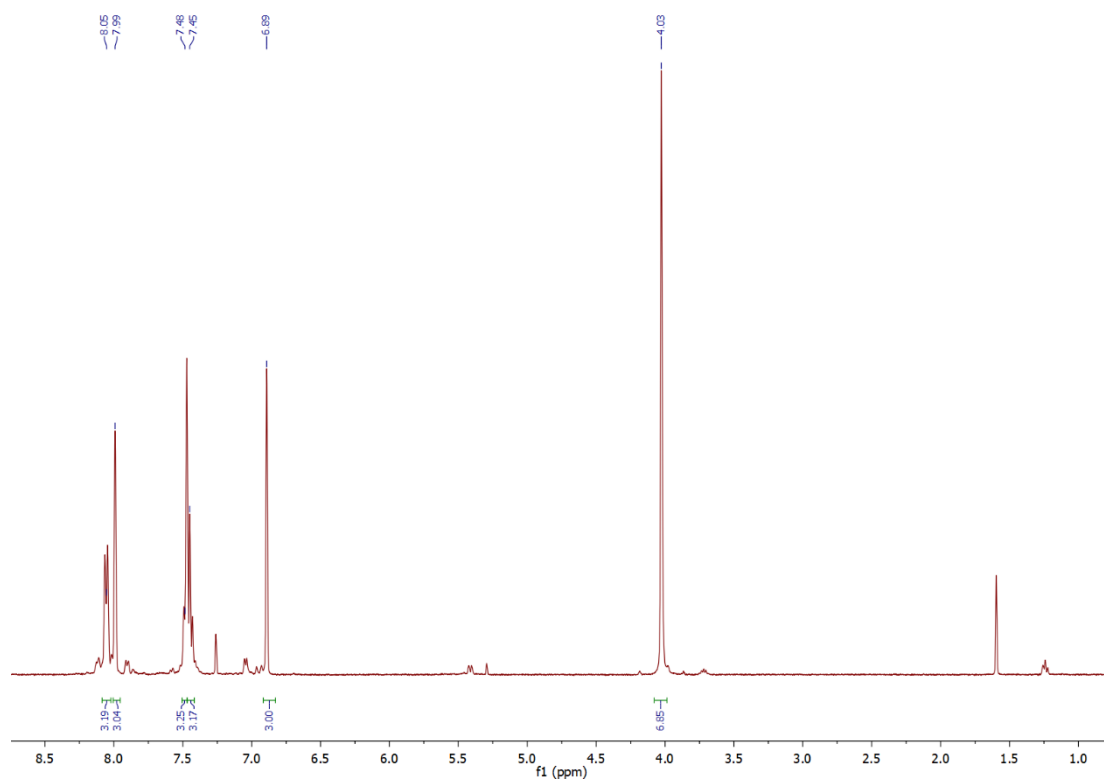

**Figure S3.** <sup>1</sup>H NMR spectrum of **4** recorded in CDCl<sub>3</sub> at 400 MHz.

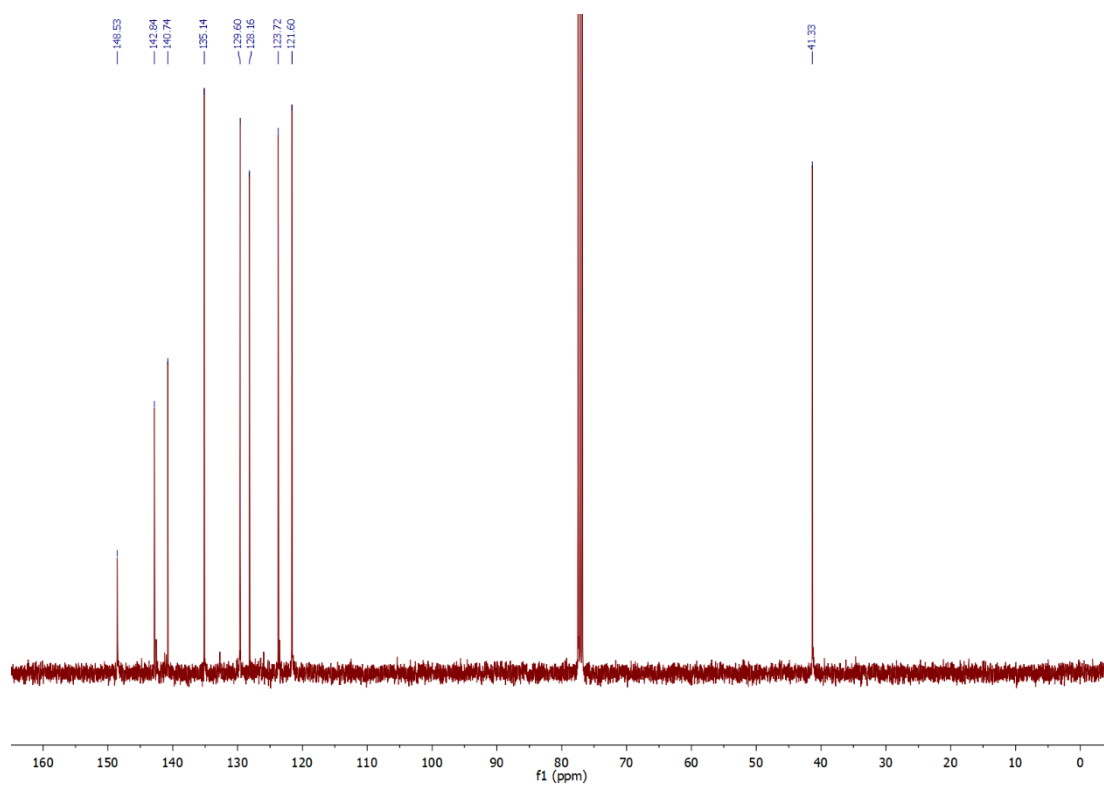

**Figure S4.** <sup>13</sup>C{<sup>1</sup>H} NMR spectrum of **4** recorded in CDCl<sub>3</sub> at 100.5 MHz.

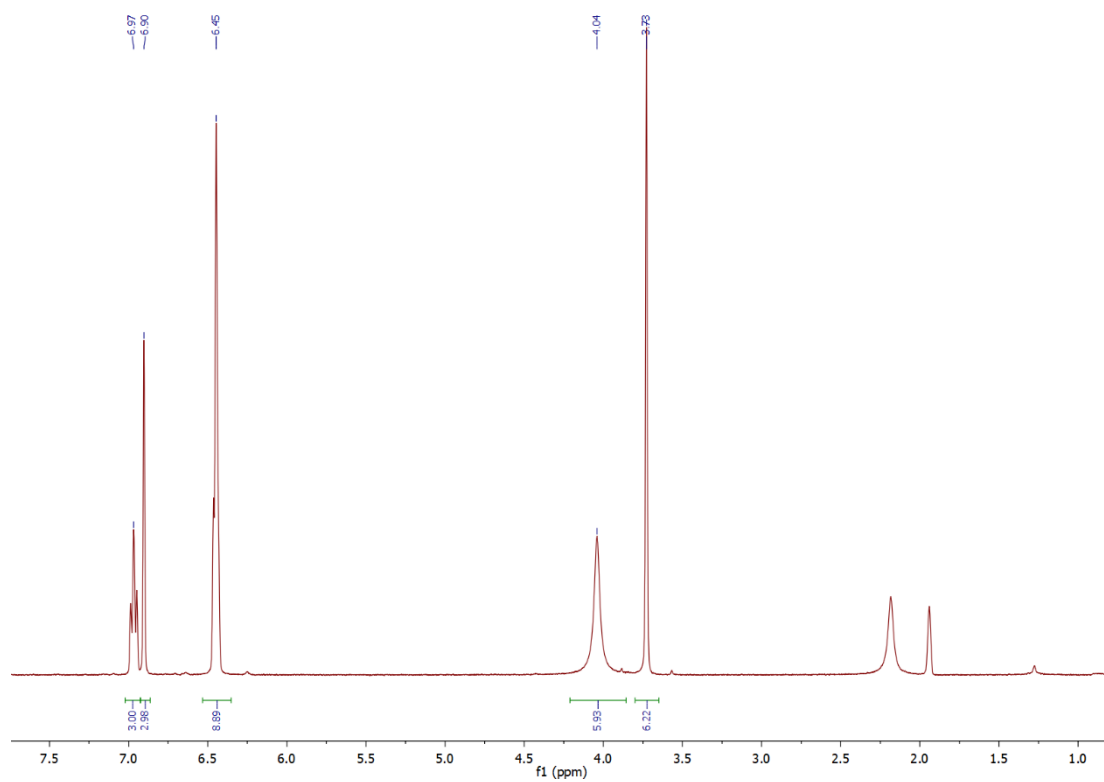

**Figure S5.** <sup>1</sup>H NMR spectrum of **5** recorded in CD<sub>3</sub>CN at 400 MHz.

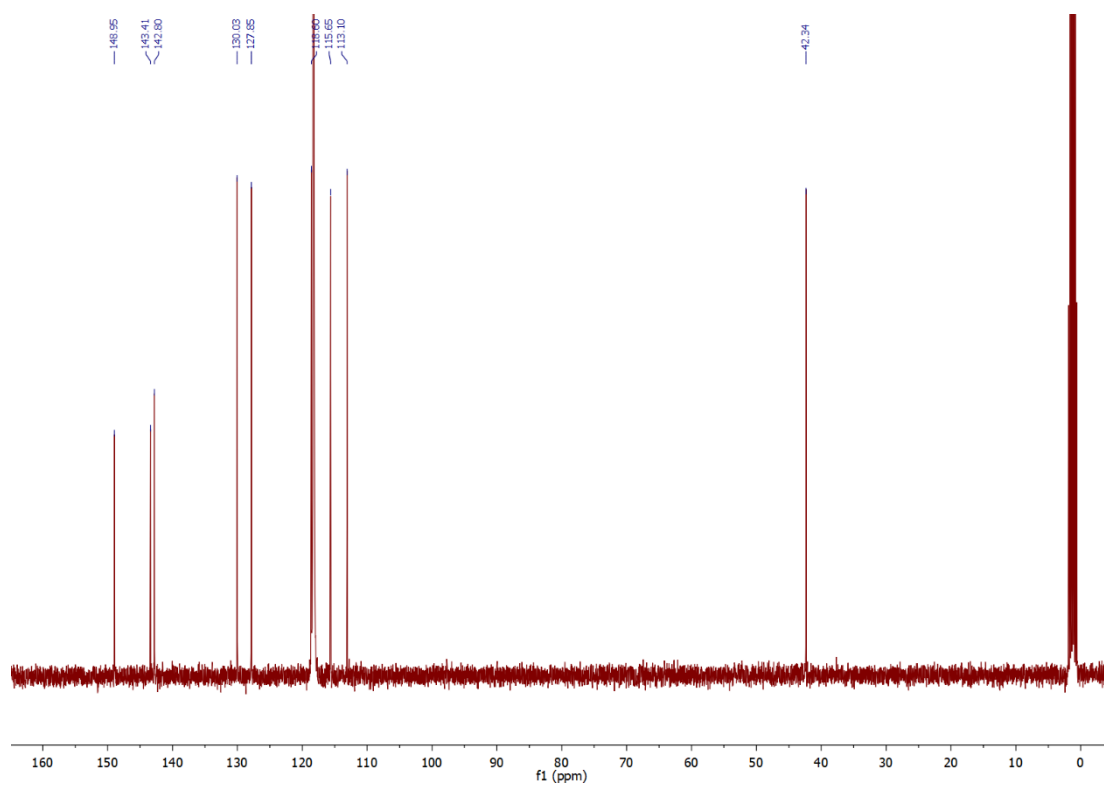

**Figure S6.** <sup>13</sup>C{<sup>1</sup>H} NMR spectrum of **5** recorded in CD<sub>3</sub>CN at 100.5 MHz.

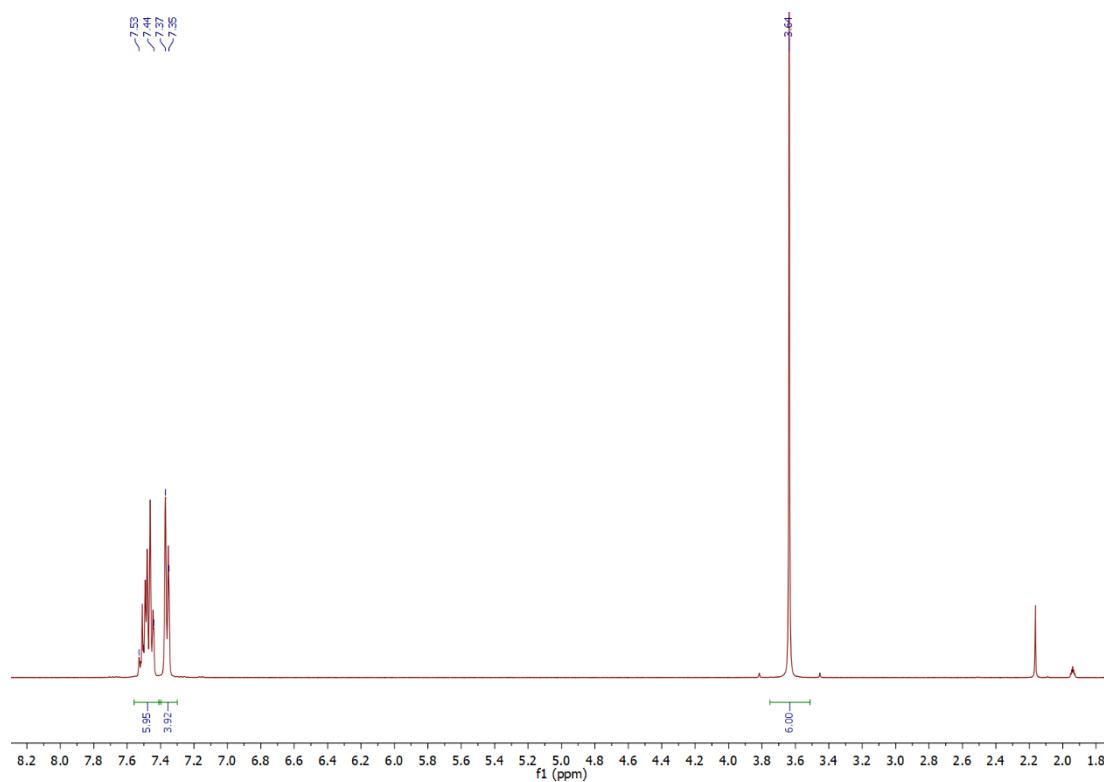

**Figure S7.** <sup>1</sup>H NMR spectrum of **6** recorded in CD<sub>3</sub>CN at 400 MHz.

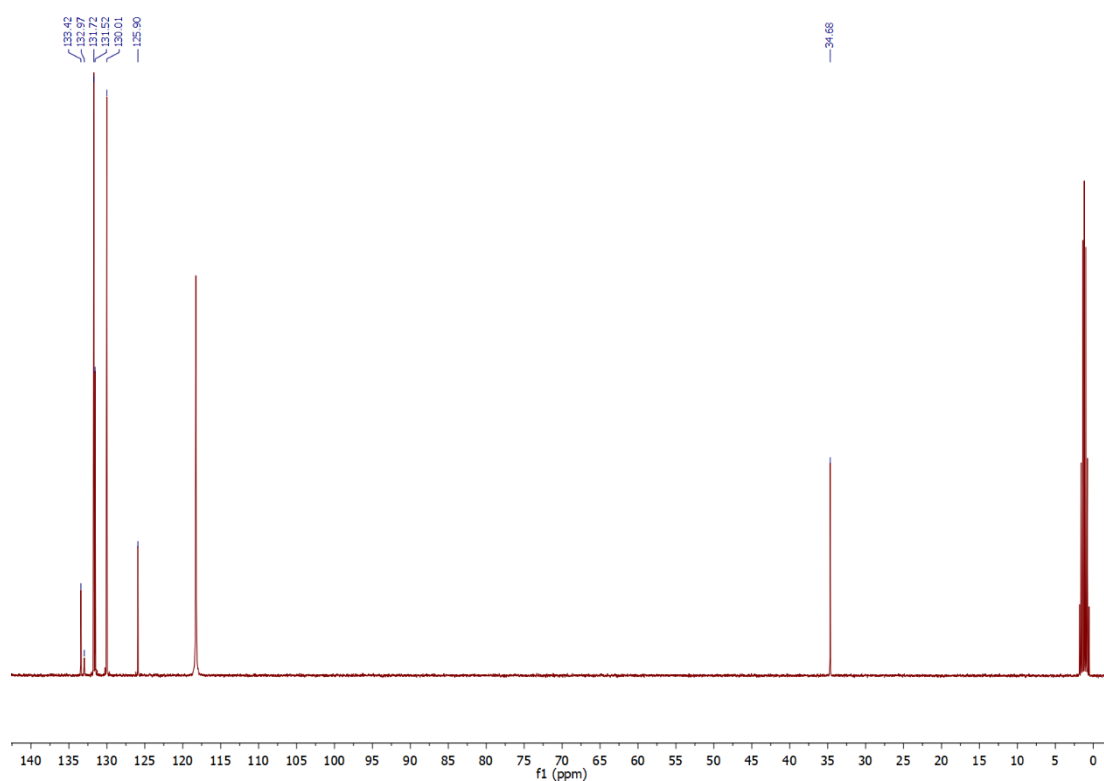

**Figure S8.** <sup>13</sup>C{<sup>1</sup>H} NMR spectrum of **6** recorded in CD<sub>3</sub>CN at 100.5 MHz.

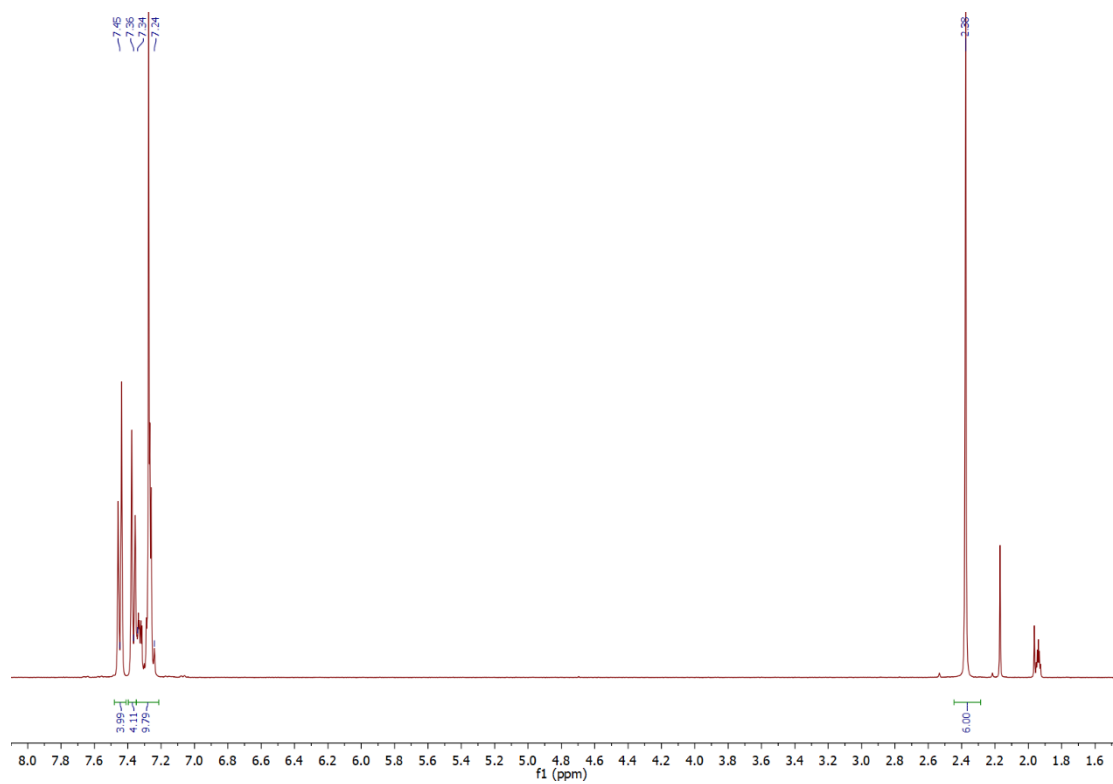

**Figure S9.** <sup>1</sup>H NMR spectrum of **7** recorded in CD<sub>3</sub>CN at 400 MHz.

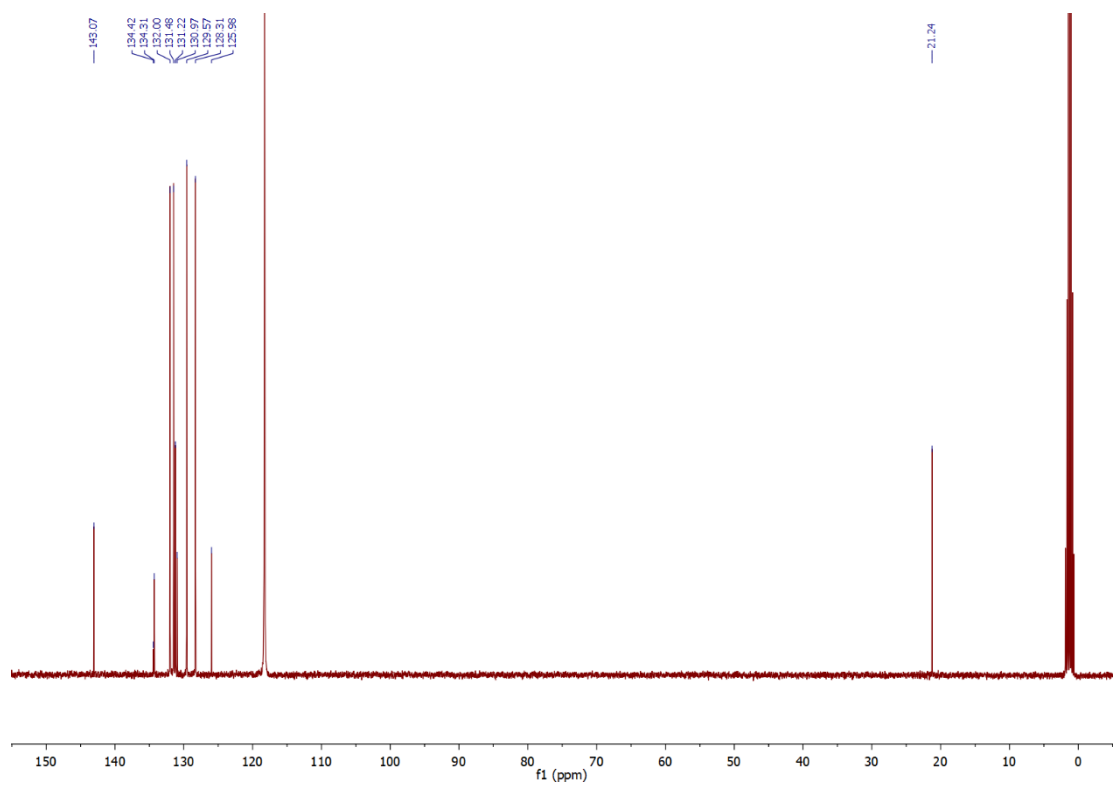

**Figure S10.** <sup>13</sup>C{<sup>1</sup>H} NMR spectrum of **7** recorded in CD<sub>3</sub>CN at 100.5 MHz.

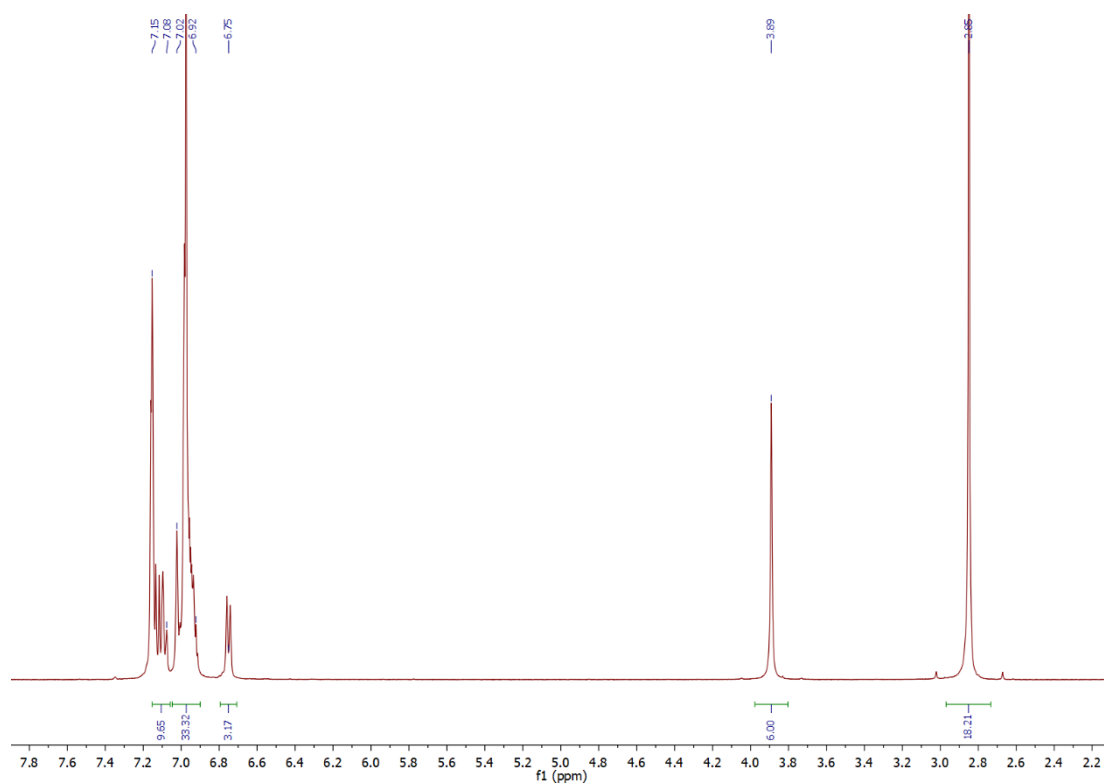

**Figure S11.** <sup>1</sup>H NMR spectrum of L(NIm<sup>Me</sup>)<sub>3</sub> (**8**) recorded in C<sub>6</sub>D<sub>6</sub> at 400 MHz.

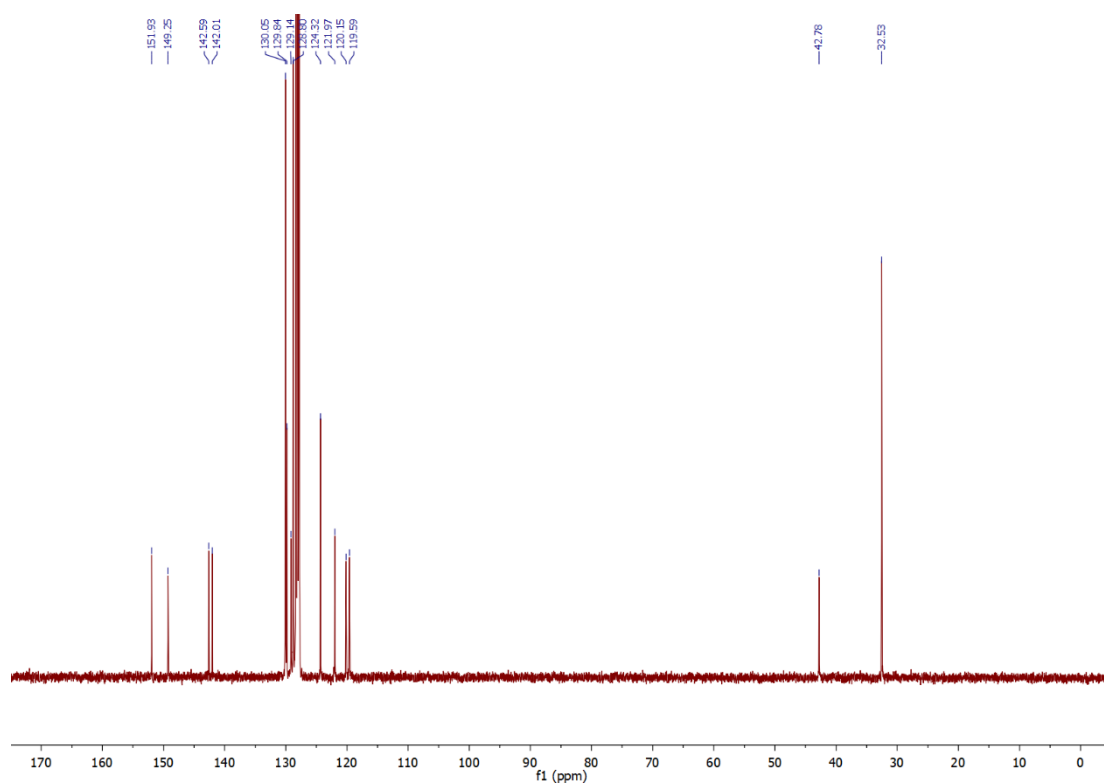

**Figure S12.** <sup>13</sup>C{<sup>1</sup>H} NMR spectrum of L(NIm<sup>Me</sup>)<sub>3</sub> (**8**) recorded in C<sub>6</sub>D<sub>6</sub> at 100.5 MHz.

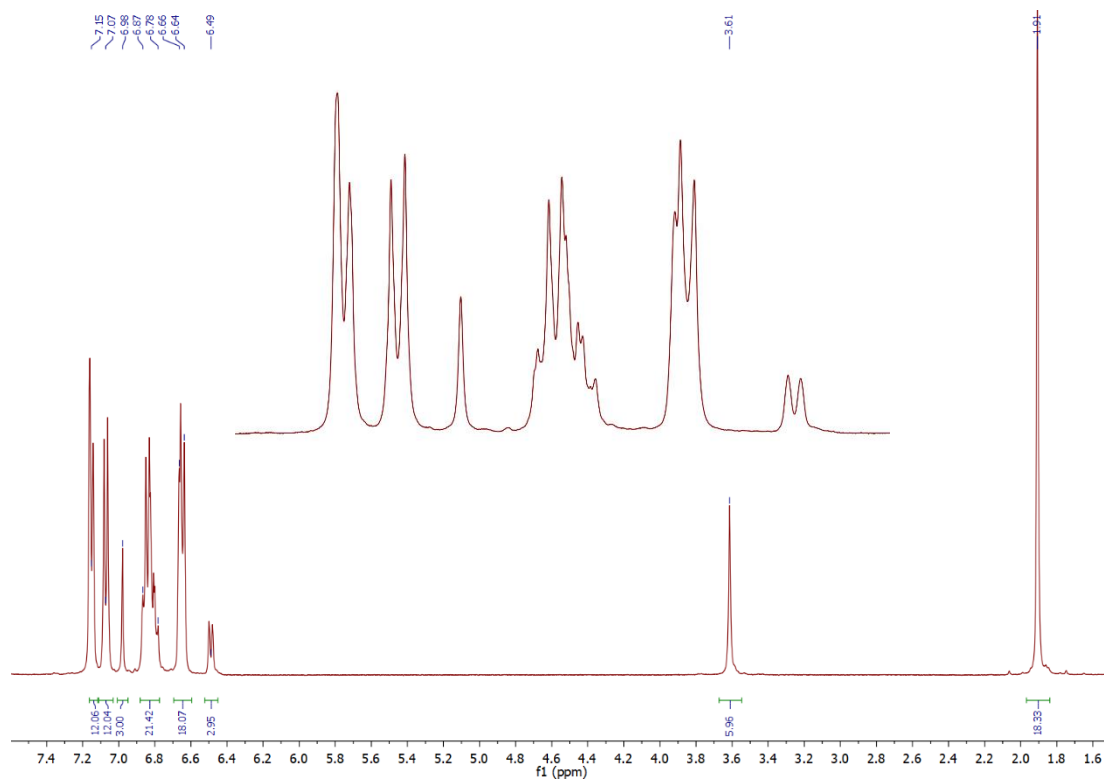

**Figure S13.** <sup>1</sup>H NMR spectrum of L(NIm<sup>Tol</sup>)<sub>3</sub> (**9**) recorded in C<sub>6</sub>D<sub>6</sub> at 400 MHz (aromatic region inset).

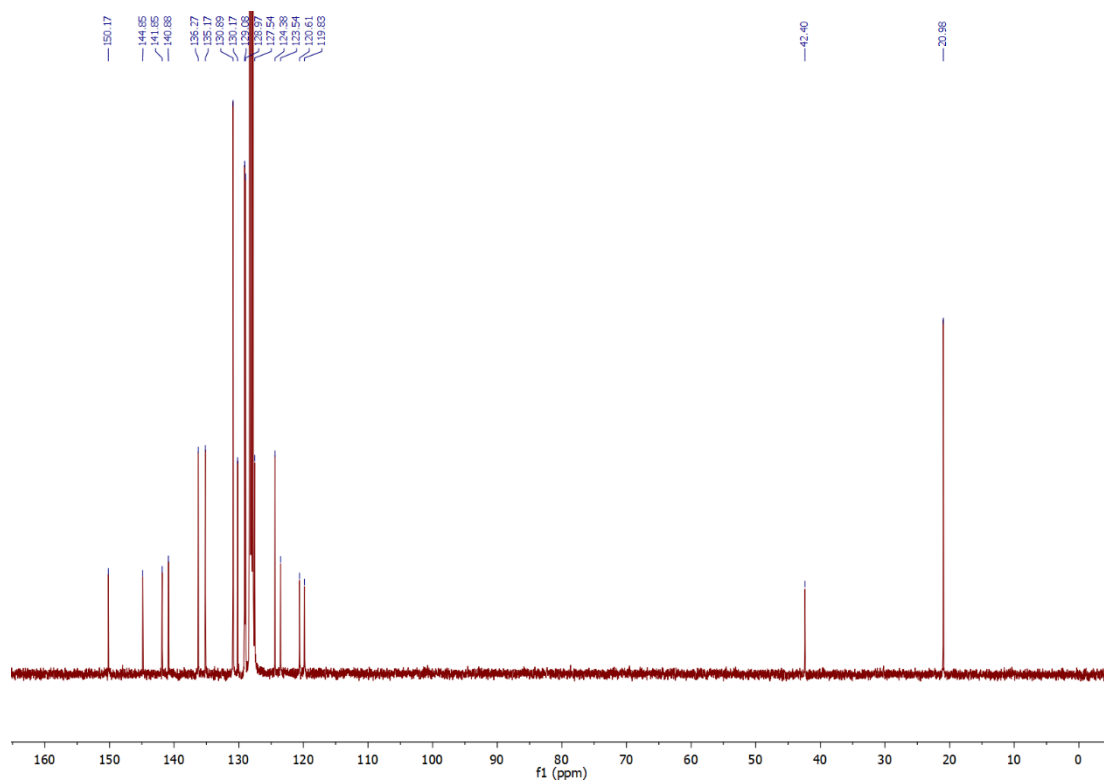

**Figure S14.** <sup>13</sup>C{<sup>1</sup>H} NMR spectrum of L(NIm<sup>Tol</sup>)<sub>3</sub> (**9**) recorded in C<sub>6</sub>D<sub>6</sub> at 100.5 MHz.



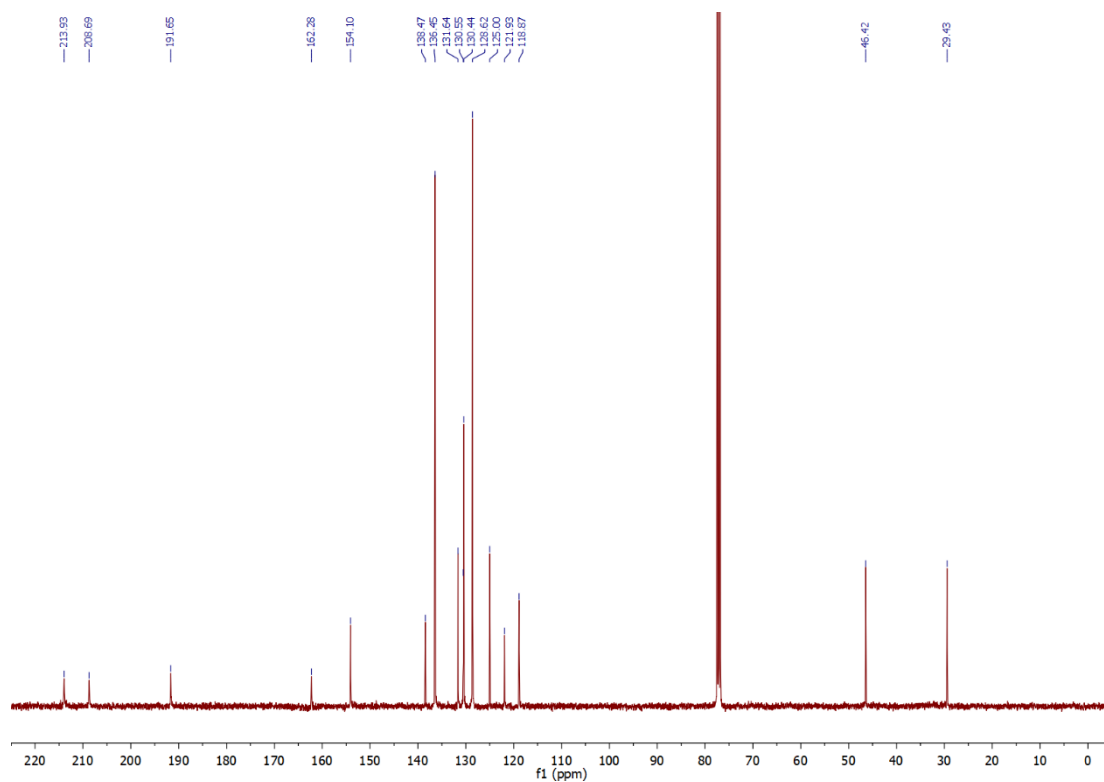

**Figure S15.**  $^{13}\text{C}\{^1\text{H}\}$  NMR spectrum of  $\text{L}(\text{NIm}^{\text{Me}})_3\text{Fe}_6\text{S}_6\text{Cl}_3$  (**11**) recorded in  $\text{CDCl}_3$  at 100.5 MHz.

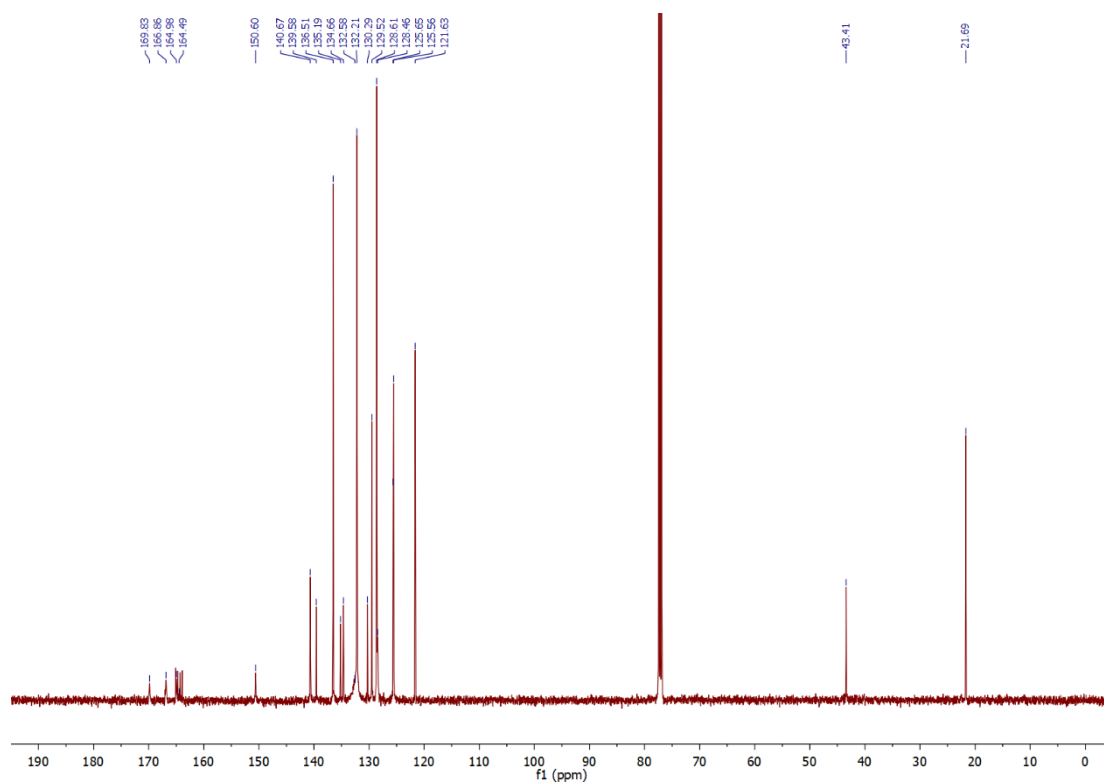

**Figure S16.**  $^{13}\text{C}\{^1\text{H}\}$  NMR spectrum of  $[(\text{L}(\text{NIm}^{\text{Tol}})_3)\text{Fe}_4\text{S}_4\text{Cl}][\text{BPh}_4]$  (**12**) recorded in  $\text{CDCl}_3$  at 100.5 MHz.

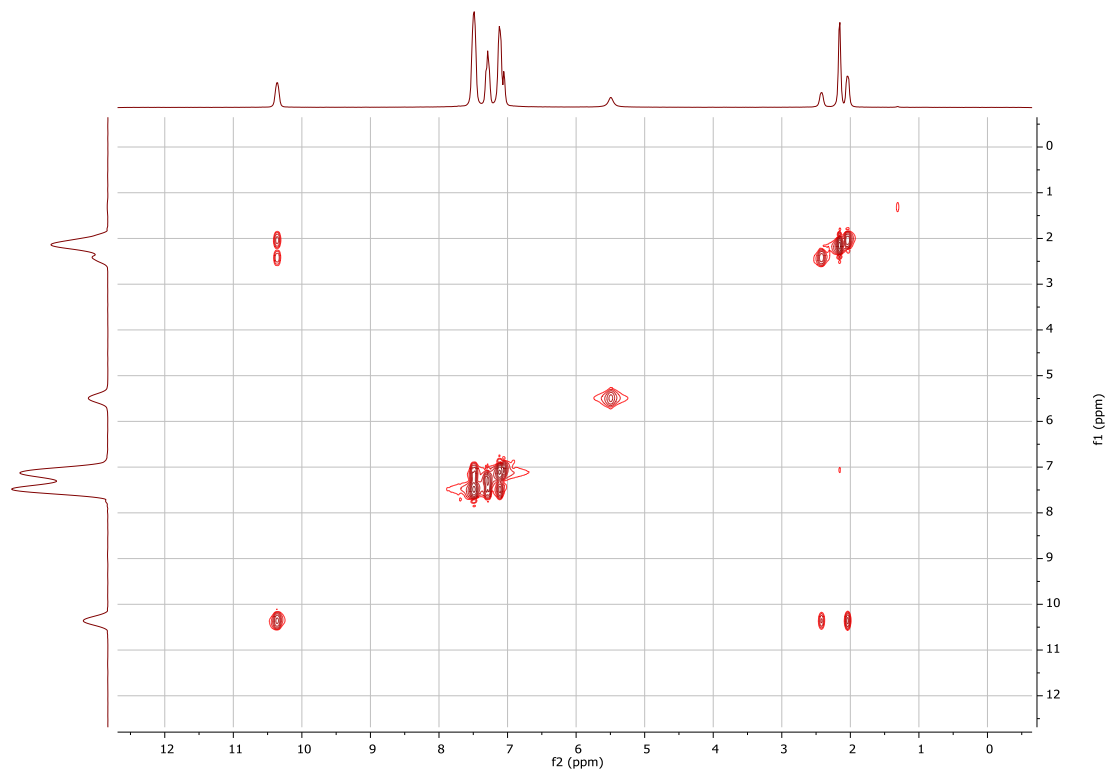

**Figure S17.**  $^1\text{H}$ - $^1\text{H}$  COSY spectrum of  $(\text{L}(\text{NIm}^{\text{Me}})_3)\text{Fe}_6\text{S}_6\text{Cl}_3$  (**11**).

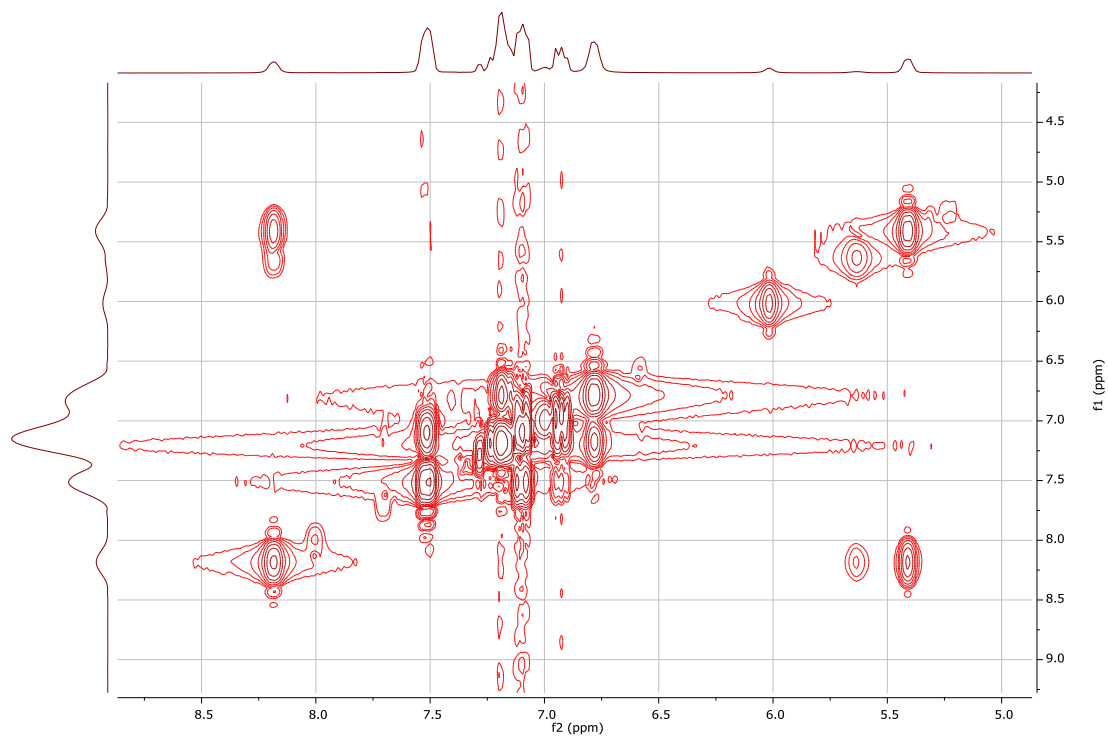

**Figure S18.**  $^1\text{H}$ - $^1\text{H}$  COSY spectrum of  $[(\text{L}(\text{NIm}^{\text{Tol}})_3)\text{Fe}_4\text{S}_4\text{Cl}][\text{BPh}_4]$  (**12**) in the aromatic region.

**FTIR Spectra**

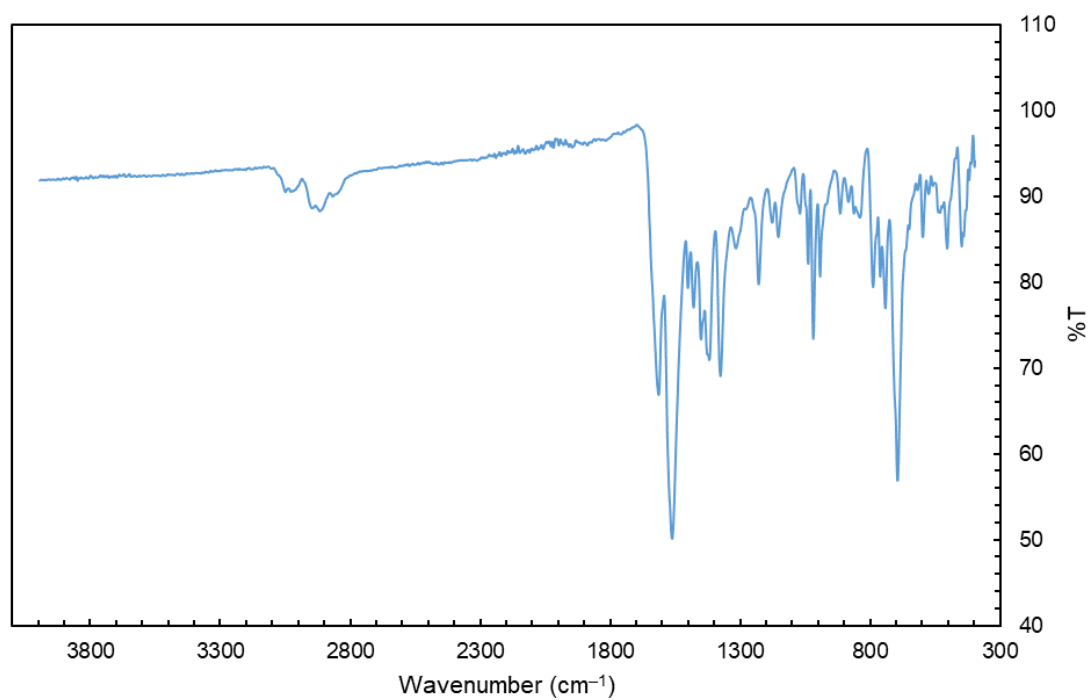

**Figure S19.** FTIR spectrum of L(NIm<sup>Me</sup>)<sub>3</sub> (**8**).

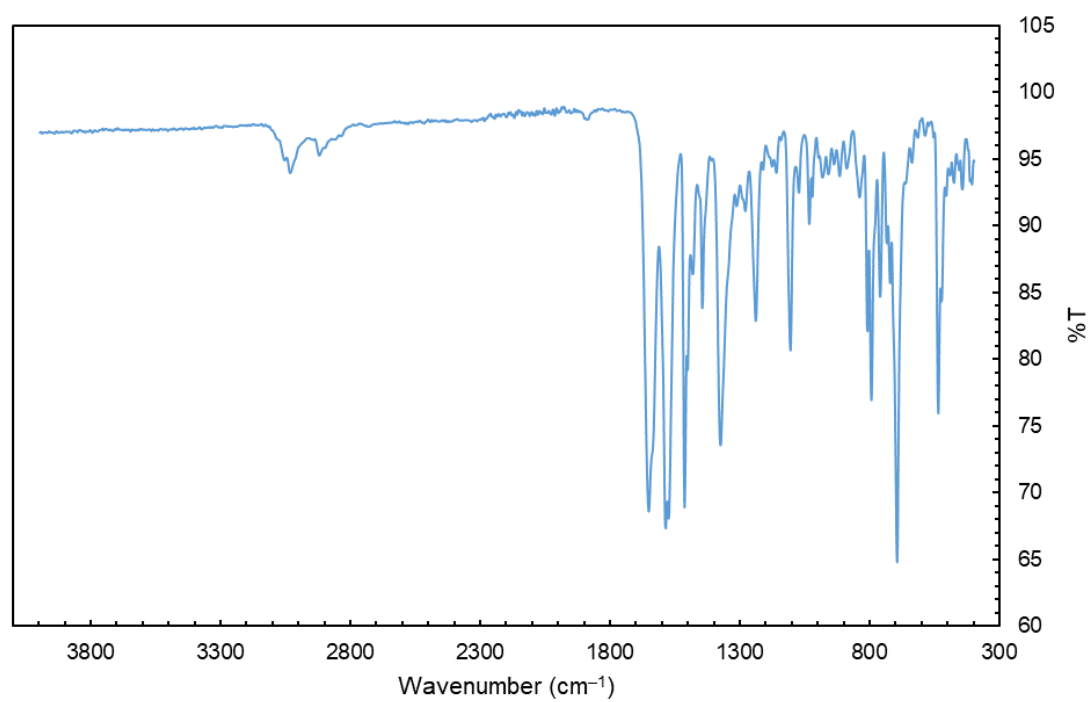

**Figure S20.** FTIR spectrum of L(NIm<sup>Tol</sup>)<sub>3</sub> (**9**).

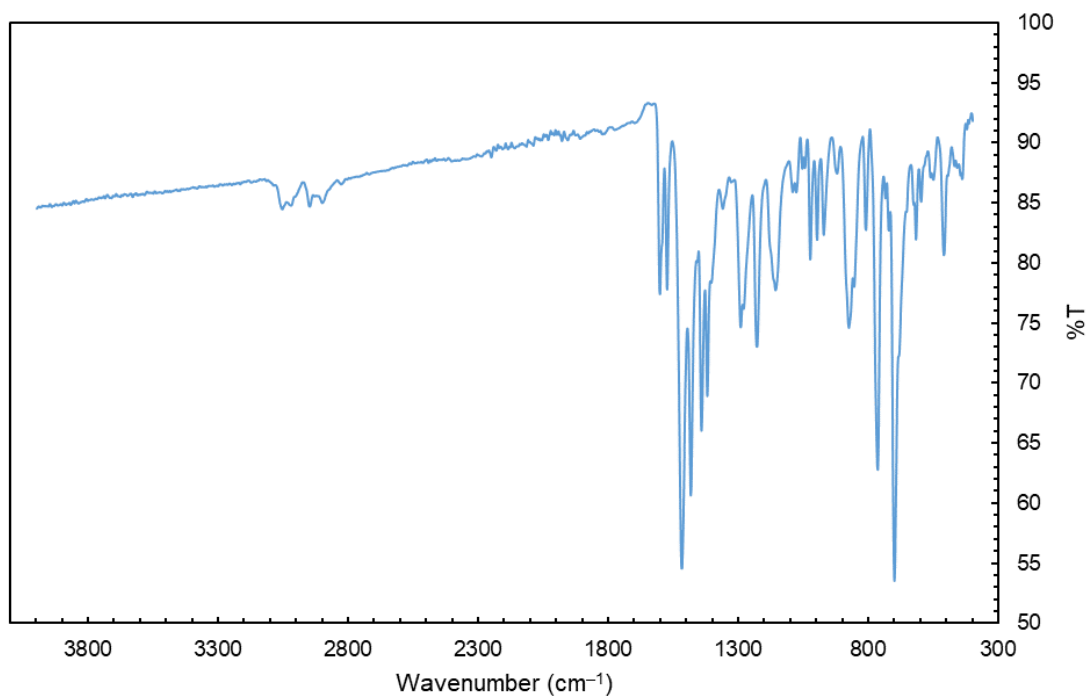

**Figure S21.** FTIR spectrum of  $L(NIm^{Me})_3Fe_6S_6Cl_3$  (**11**).

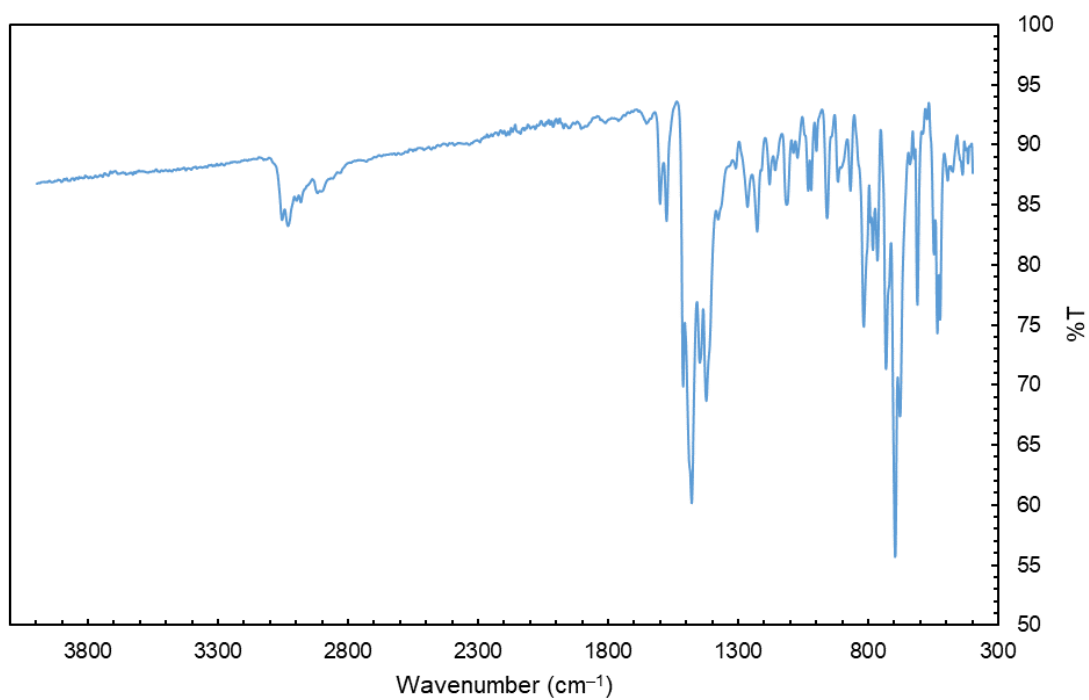

**Figure S22.** FTIR spectrum of  $[(L(NIm^{Tol})_3)Fe_4S_4Cl][BPh_4]$  (**12**).

## Additional Spectroscopy

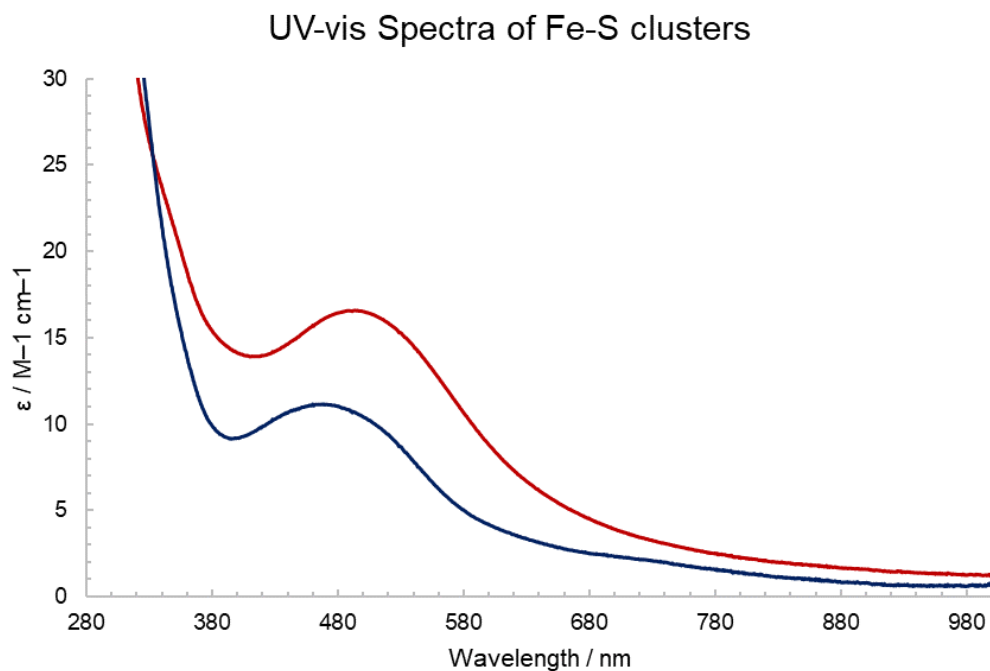

**Figure S23.** UV-Vis spectra of  $(\text{L}(\text{NIm}^{\text{Me}})_3)\text{Fe}_6\text{S}_6\text{Cl}_3$  (**11**; red trace) and  $[(\text{L}(\text{NIm}^{\text{Me}})_3)\text{Fe}_4\text{S}_4\text{Cl}_4][\text{BPh}_4]$  (**12**; blue trace) (*ca.* 1mM in THF).

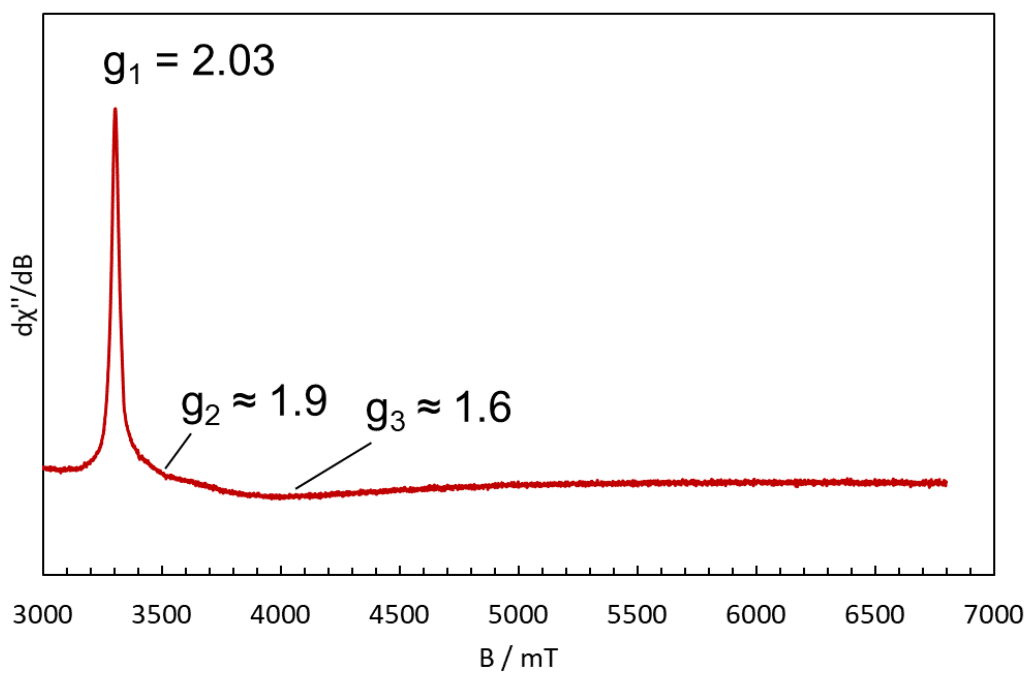

**Figure S24.** X-band EPR spectrum of  $(\text{L}(\text{NIm}^{\text{Me}})_3)\text{Fe}_6\text{S}_6\text{Cl}_3$  (**11**) in a 2-MeTHF glass at 8 K. MW frequency = 9.374 MHz.

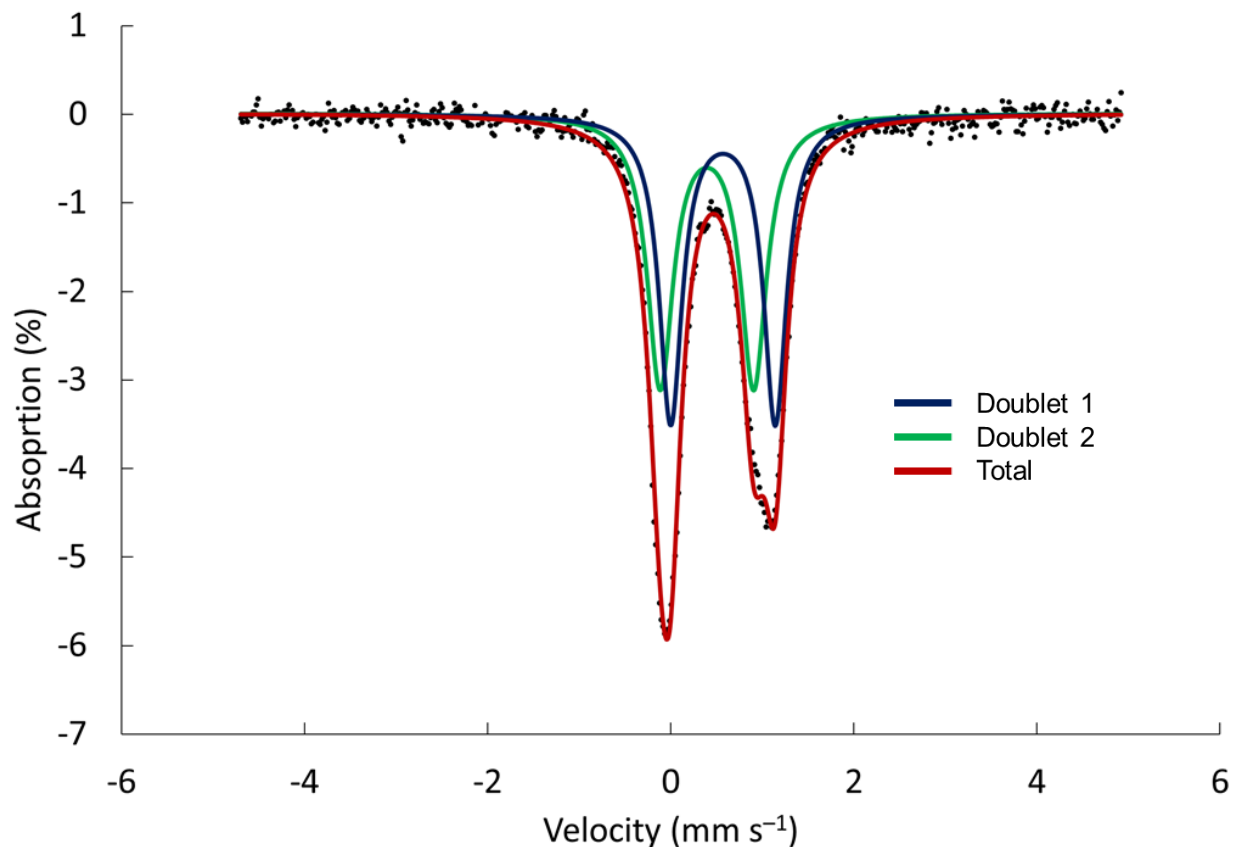

**Figure S25.** Zero-field  $^{57}\text{Fe}$  Mössbauer spectrum of solid  $(\text{L}(\text{NIm}^{\text{Me}})_3)\text{Fe}_6\text{S}_6\text{Cl}_3$  (**11**) at 90 K with alternative simulations. Black circles represent experimental data, solid lines are simulations. Simulation parameters: Doublet 1:  $\delta = 0.57 \text{ mm s}^{-1}$ ,  $\Delta E_Q = 1.14 \text{ mm s}^{-1}$ ,  $\Gamma = 0.30 \text{ mm s}^{-1}$ , relative area = 0.5; Doublet 2:  $\delta = 0.39 \text{ mm s}^{-1}$ ,  $\Delta E_Q = 1.02 \text{ mm s}^{-1}$ ,  $\Gamma = 0.34 \text{ mm s}^{-1}$ , relative area = 0.5. We disfavor this simulation as the isomer shift values differ significantly from those reported for  $[\text{Fe}_6\text{S}_6\text{X}_6]^{3-}$  (X = halide,  $\text{RS}^-$ ,  $\text{RO}^-$ ) clusters.<sup>1</sup>

### <sup>1</sup>H NMR Spectra of Reaction Mixtures

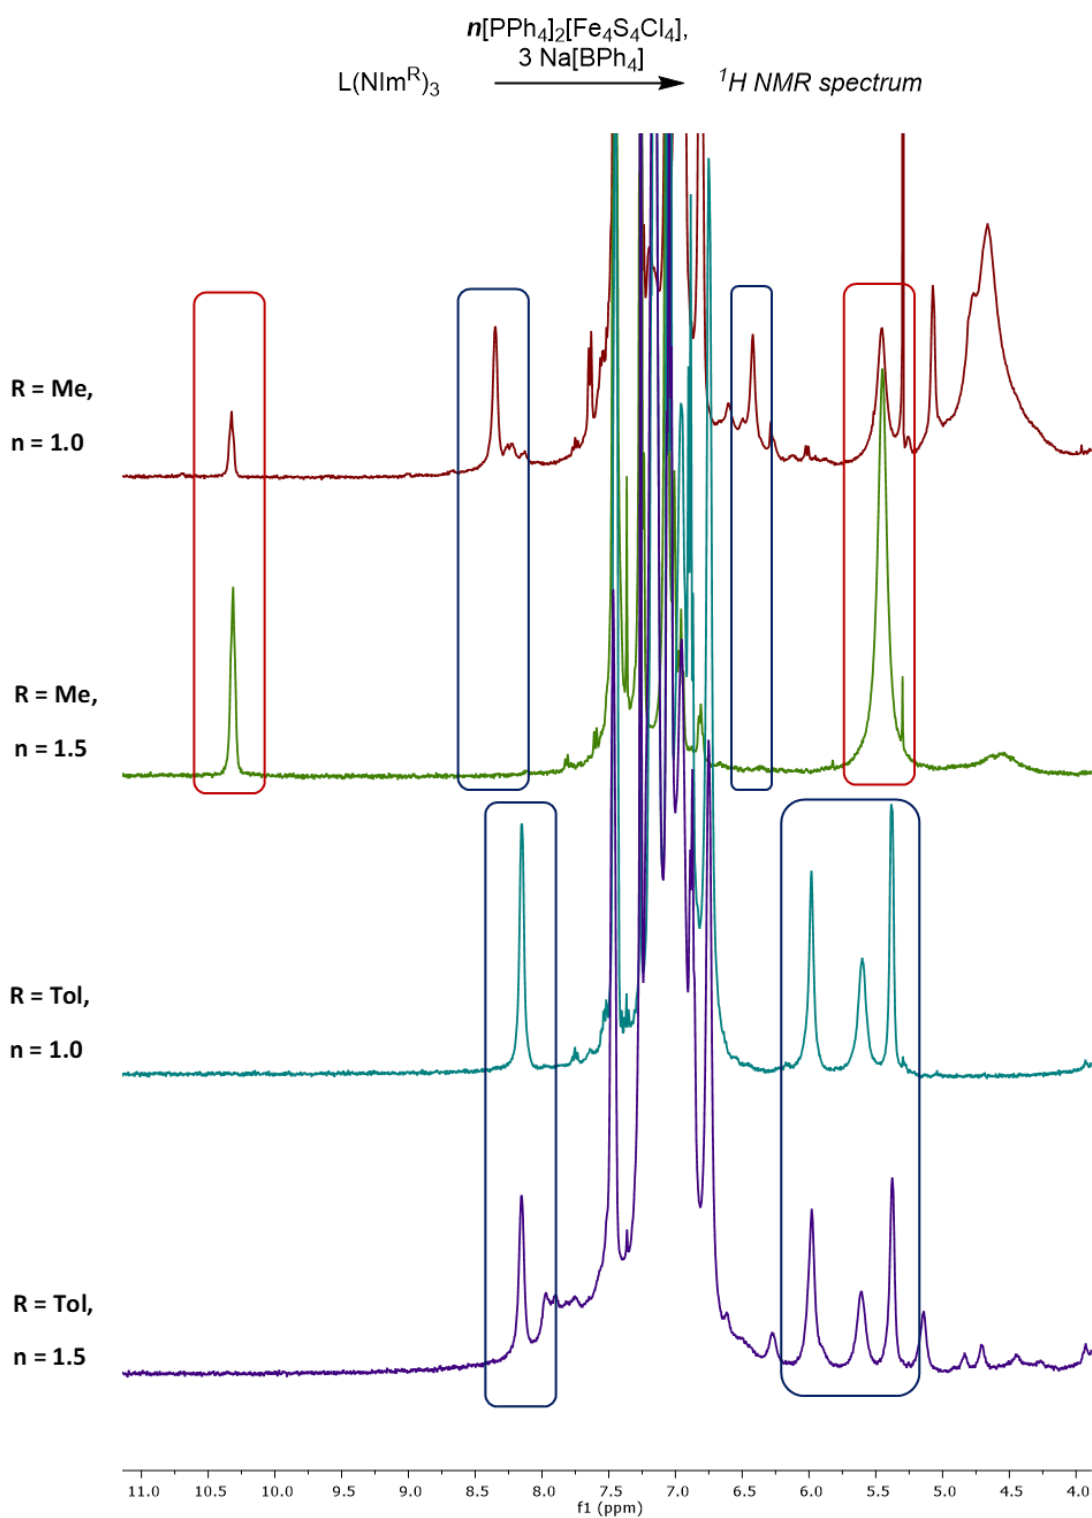

**Figure S26.** <sup>1</sup>H NMR spectra in CDCl<sub>3</sub> of the crude mixtures from the reactions between L(NIm<sup>R</sup>)<sub>3</sub> and different stoichiometries of [PPh<sub>4</sub>]<sub>2</sub>[Fe<sub>4</sub>S<sub>4</sub>Cl<sub>4</sub>] and Na[BPh<sub>4</sub>]. **Blue boxes** indicate peaks assigned to  $[(\text{L(NIm}^{\text{R}})_3\text{Fe}_4\text{S}_4\text{Cl}_4)]^+$  clusters; **red boxes** peaks assigned to  $(\text{L(NIm}^{\text{R}})_3\text{Fe}_6\text{S}_6\text{Cl}_3)$  clusters.

## References

1. Kanatzidis, M. G.; Hagen, W. R.; Dunham, W. R.; Lester, R. K.; Coucouvanis, D. Metastable Fe/S Clusters. The Synthesis, Electronic Structure, and Transformations of the  $[\text{Fe}_6\text{S}_6\text{Cl}_6]^{3-}$ ,  $[\text{Fe}_6\text{S}_6\text{Br}_6]^{3-}$ ,  $[\text{Fe}_6\text{S}_6\text{I}_6]^{3-}$ ,  $[\text{Fe}_6\text{S}_6(\text{RS})_6]^{3-}$ ,  $[\text{Fe}_6\text{S}_6(\text{RO})_6]^{3-}$  Clusters and the Structure of  $[(\text{C}_2\text{H}_5)_4\text{N}]_3[\text{Fe}_6\text{S}_6\text{Cl}_6]$ . *J Am Chem Soc* **1985**, 107 (4), 953-961.
